# Supplementary material for: Beliefs and Attitudes of British Residents about the Welfare of Fur-Farmed Species and the Import and Sale of Fur Products in the UK
Source: MDPI journal article supplement (doi:10.3390/ani12050538), 2022-02-22
Supplement: s1 [file s1]

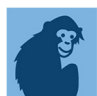

Supplementary File S1: Survey

**Survey section one – demographic information**

Please check the box below to indicate you have read and understood the above information and consent to continue with the survey. (tick box)

---

**What is your gender?**

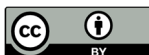

Copyright: © 2022 by the authors. Licensee MDPI, Basel, Switzerland. This article is an open access article distributed under the terms and conditions of the Creative Commons Attribution (CC BY) license (<https://creativecommons.org/licenses/by/4.0/>).

Female

Male

Prefer not to say

Other (please specify)

---

---

**What is your age?**

16-19

20-29

30-39

40-49

50-59

60-69

70-79

80+

Prefer not to say

---

---

**What is your nationality?**

Northern Irish

Scottish

English

Welsh

Other (please specify)

---

---

**Which region of the UK do you live in?**

Northern Ireland

Scotland

Wales

East of England

East Midlands

South East

South West

North East

North West

---

West Midlands  
Yorkshire and the Humber  
Other (please specify)

---



---

**Which is your ethnic group?**

---

White  
Asian/Asian British  
Mixed/multiple ethnic groups  
Black/African/Caribbean/Black British  
Chinese  
Arab  
Prefer not to say  
Other (please specify)

---



---

**Which is your religion?**

---

No religion  
Christian (including Church of England, Catholic, Protestant and  
all other Christian denominations)  
Buddhist  
Hindu  
Jewish  
Muslim  
Sikh  
Prefer not to say

---



---

**Which is the highest level of education you have completed?**

---

Primary school  
Secondary school (GCSE or equivalent)  
College (A Level or equivalent)  
University (Bachelors degree or equivalent)  
University (Masters degree or equivalent)  
University (PhD or equivalent)  
Prefer not to say  
Other (please specify)

---



---

**Which is your current employment status?**

---

Full-time employment  
Part-time employment  
Self-employed  
Unemployed  
Student  
Retired  
Prefer not to say

---



---

**Which is your current annual income (before tax)?**

---

Less than £15,000  
 £15,001 – £20,000  
 £20,001 – £30,000  
 £30,001 – £40,000  
 £40,001 – £50,000  
 £60,001 – £70,000  
 £70,001 – £100,000  
 £101,000 +  
 Prefer not to say  
 Other (please specify)

### Survey section 2: beliefs about the welfare of animals killed for their fur

This section of the survey focuses on your beliefs about the welfare of animals on fur farms and those trapped and killed in the wild for their fur.

Please note: Animals in relation to fur farming refers to species such as mink, fox, raccoon dog, rabbit, and chinchilla. Animals in relation to those trapped in the wild refer to species such as coyote, lynx, beaver and raccoon.

An animal's quality of life can be classified as: 'a life not worth living', a 'life worth living' and 'a good life'.

The concept of 'a good life' recognises the distinction that an animal's quality of life is over and beyond that of a life worth living.

### Q 11 – 18

| Question                                                                                   | Strongly Agree | Agree | Neutral | Disagree | Strongly Disagree |
|--------------------------------------------------------------------------------------------|----------------|-------|---------|----------|-------------------|
| I believe animals on fur farms generally have a life worth living                          |                |       |         |          |                   |
| I believe animals on fur farms generally have a good life                                  |                |       |         |          |                   |
| I believe animals farmed for their fur are killed humanely                                 |                |       |         |          |                   |
| I believe animal welfare standards on fur farms are well regulated                         |                |       |         |          |                   |
| I believe fur farms can meet the welfare needs of species such as mink and fox             |                |       |         |          |                   |
| I believe cages provide fur farm species such as mink and fox with a good level of welfare |                |       |         |          |                   |
| I believe leg-hold traps used to catch wild species such as coyote and                     |                |       |         |          |                   |

|                                                                         |
|-------------------------------------------------------------------------|
| lynx, do not cause<br>suffering                                         |
| I believe animals caught in<br>traps in the wild are killed<br>humanely |

**Survey section 3:** attitudes towards buying fur and the importation and sale of fur in the UK

This section of the survey asks you about your attitudes towards the purchase of fur products and the sale and importation of fur products in the UK.

Please note: 'fur products' in the questions below refers to products made from the skin of animals which have been obtained either from fur farms or from animals trapped in the wild.

Q 19 – 22

| Question                                                                                                                                                 | Yes | No |
|----------------------------------------------------------------------------------------------------------------------------------------------------------|-----|----|
| Are you aware that farming animals for their fur is banned in the UK?                                                                                    |     |    |
| Are you aware that fur from farmed species is imported and sold in the UK?                                                                               |     |    |
| Are you aware that fur from wild caught species is imported and sold in the UK?                                                                          |     |    |
| In the past five years, have you knowingly purchased any products made from real animal fur? (This includes accessories or garments with fur trimmings.) |     |    |

Q23

|                                                                                                                |
|----------------------------------------------------------------------------------------------------------------|
| <b>If you purchased a product made from real fur, did you consider any of the following? (Multiple choice)</b> |
| Country of origin of the product                                                                               |
| Species of animal used to make the product                                                                     |
| Whether the animal was farmed or wild caught                                                                   |
| N/A – I did not purchase a real fur product                                                                    |

Q24

If you have purchased a product made from real fur, please state your main reasons for doing so. (If you haven't purchased a fur product please enter 'N/A') (open text response)

Q25

|                                                                                                                                       |
|---------------------------------------------------------------------------------------------------------------------------------------|
| <b>If you were to purchase a product made from real fur, which of the following would be most important to you? (Multiple choice)</b> |
|---------------------------------------------------------------------------------------------------------------------------------------|

Country of origin of the product  
 Species of animal used to make the product  
 Whether the animal had received a good level of welfare  
 Whether the animal was killed humanely  
 Whether the animal was farmed or wild caught  
 N/A – I would not purchase a fur product

Q26-36

| Question                                                                                                                                 | Strongly Agree | Agree | Neutral | Disagree | Strongly Disagree |
|------------------------------------------------------------------------------------------------------------------------------------------|----------------|-------|---------|----------|-------------------|
| I believe all fur products should be labelled as 'real' or 'synthetic'                                                                   |                |       |         |          |                   |
| I approve of retailers that sell real fur                                                                                                |                |       |         |          |                   |
| Buying real fur is morally acceptable                                                                                                    |                |       |         |          |                   |
| There is no moral difference between farming animals such as pigs and chickens for meat and farming animals such as mink and fox for fur |                |       |         |          |                   |
| There is no moral difference between wearing real fur and wearing leather                                                                |                |       |         |          |                   |
| It is morally acceptable for the UK government to ban fur farming and continue to import and sell fur from producers overseas            |                |       |         |          |                   |
| I oppose the use of real fur regardless of the welfare schemes implemented by the fur trade                                              |                |       |         |          |                   |
| I oppose the use of real fur regardless of the species used                                                                              |                |       |         |          |                   |
| Farming and killing animals for commercial use in fashion is wrong                                                                       |                |       |         |          |                   |
| Trapping and killing wild animals for commercial use in fashion is wrong                                                                 |                |       |         |          |                   |
| No regulatory changes to animal welfare standards could provide animals farmed for their fur with 'a life worth living'                  |                |       |         |          |                   |

Q37

---

**Which of the following actions would you be most likely to support? (Multiple choice)**

---

- A total ban on the importation and sale of real fur in the UK
- Continued importation and sale of real fur but with more stringent regulations
- Continued importation and sale of real fur in the UK under current regulations
- Unsure
- 

End of survey.

Thank you for taking the time to complete this survey.
